# Supplementary material
Source: PubMed Central journal article supplement (PMC3982699)
Supplement: 80bbb6e59d11237915f80646a638d07e_genetics.114.161224-6.pdf [file 80bbb6e59d11237915f80646a638d07e_genetics.114.161224-6.pdf]

**Table S1 S. cerevisiae strains used in this study**

| Strains | Genotype                                                                                                      | Reference                  |
|---------|---------------------------------------------------------------------------------------------------------------|----------------------------|
| YPH499  | <i>MATa ura3-52 lys2-801 ade2-101 trp1Δ63 his3Δ200 leu2Δ1</i>                                                 | (SIKORSKI and HIETER 1989) |
| YPH500  | <i>MATα ura3-52 lys2-801 ade2-101 trp1Δ63 his3Δ200 leu2Δ1</i>                                                 | (SIKORSKI and HIETER 1989) |
| Y2243   | <i>MATa ura3-52 lys2-801 ade2-101 trp1Δ63 his3Δ200 leu2Δ1 fpr3Δ::kanMX6</i>                                   | This study                 |
| Y2244   | <i>MATa ura3-52 lys2-801 ade2-101 trp1Δ63 his3Δ200 leu2Δ1 fpr3Δ::kanMX6</i>                                   | This study                 |
| Y2245   | <i>MATa ura3-52 lys2-801 ade2-101 trp1Δ63 his3Δ200 leu2Δ1 fpr4Δ::kanMX6</i>                                   | This study                 |
| Y2246   | <i>MATa ura3-52 lys2-801 ade2-101 trp1Δ63 his3Δ200 leu2Δ1 fpr4Δ::kanMX6</i>                                   | This study                 |
| Y2247   | <i>MATa ura3-52 lys2-801 ade2-101 trp1Δ63 his3Δ200 leu2Δ1 fpr3Δ::kanMX6 fpr4Δ::kanMX6</i>                     | This study                 |
| Y2248   | <i>MATα ura3-52 lys2-801 ade2-101 trp1Δ63 his3Δ200 leu2Δ1 fpr3Δ::kanMX6 fpr4Δ::kanMX6</i>                     | This study                 |
| Y14     | <i>MATa ura3-52 lys2-801 ade2-101 trp1Δ63 his3Δ200 leu2Δ1 CFIII (CEN3.L.YPH983) TRP1 SUP11</i>                | P. Hieter                  |
| Y2249   | <i>MATa ura3-52 lys2-801 ade2-101 trp1Δ63 his3Δ200 leu2Δ1 CFIII (CEN3.L.YPH983) TRP1 SUP11 fpr3Δ::His3MX6</i> | This study                 |
| Y2250   | <i>MATa ura3-52 lys2-801 ade2-101 trp1Δ63 his3Δ200 leu2Δ1 CFIII (CEN3.L.YPH983) TRP1 SUP11 fpr3Δ::His3MX6</i> | This study                 |
| Y2251   | <i>MATa ura3-52 lys2-801 ade2-101 trp1Δ63 his3Δ200 leu2Δ1 CFIII (CEN3.L.YPH983) TRP1 SUP11 fpr3Δ::His3MX6</i> | This study                 |
| Y2252   | <i>MATa ura3-52 lys2-801 ade2-101 trp1Δ63 his3Δ200 leu2Δ1 CFIII (CEN3.L.YPH983) TRP1 SUP11 fpr4Δ::His3MX6</i> | This study                 |
| Y2253   | <i>MATa ura3-52 lys2-801 ade2-101 trp1Δ63 his3Δ200 leu2Δ1 CFIII (CEN3.L.YPH983) TRP1 SUP11 fpr4Δ::kanMX6</i>  | This study                 |
| Y2254   | <i>MATa ura3-52 lys2-801 ade2-101 trp1Δ63 his3Δ200 leu2Δ1 CFIII (CEN3.L.YPH983) TRP1 SUP11 fpr4Δ::kanMX6</i>  | This study                 |
| Y2255   | <i>MATa ura3-52 lys2-801 ade2-101 trp1Δ63 his3Δ200 leu2Δ1 [pRS415-PGAL1-3HA-CSE4]</i>                         | This study                 |
| Y2256   | <i>MATa ura3-52 lys2-801 ade2-101 trp1Δ63 his3Δ200 leu2Δ1 fpr3Δ::kanMX6 [pRS415-PGAL1-3HA-CSE4]</i>           | This study                 |
| Y2257   | <i>MATa ura3-52 lys2-801 ade2-101 trp1Δ63 his3Δ200 leu2Δ1 fpr4Δ::kanMX6 [pRS415-PGAL1-3HA-CSE4]</i>           | This study                 |
| Y2258   | <i>MATa ura3-52 lys2-801 ade2-101 trp1Δ63 his3Δ200 leu2Δ1 psh1Δ::kanMX6 [pRS415-PGAL1-3HA-CSE4]</i>           | This study                 |

|       |                                                                                                                         |            |
|-------|-------------------------------------------------------------------------------------------------------------------------|------------|
| Y2340 | <i>MATa ura3-52 lys2-801 ade2-101 trp1Δ63 his3Δ200 leu2Δ1 fpr3Δ::kanMX6 psh1Δ::kanMX6 [pRS415-PGAL1-3HA-CSE4]</i>       | This study |
| Y2259 | <i>MATa ura3-52 lys2-801 ade2-101 trp1Δ63 his3Δ200 leu2Δ1 fpr3Δ::kanMX6 [pRS415-PGAL1-3HA-CSE4] [pRS416-FPR3]</i>       | This study |
| Y2260 | <i>MATa ura3-52 lys2-801 ade2-101 trp1Δ63 his3Δ200 leu2Δ1 fpr3Δ::kanMX6 [pRS415-PGAL1-3HA-CSE4] [pRS416]</i>            | This study |
| Y2261 | <i>MATa ura3-52 lys2-801 ade2-101 trp1Δ63 his3Δ200 leu2Δ1 fpr3Δ::kanMX6 [pRS415-PGAL1-3HA-CSE4] [pRS416-fpr3 W363L]</i> | This study |
| Y2262 | <i>MATa ura3-52 lys2-801 ade2-101 trp1Δ63 his3Δ200 leu2Δ1 fpr3Δ::kanMX6 [pRS415-PGAL1-3HA-CSE4] [pRS416-fpr3 F402Y]</i> | This study |
| Y2263 | <i>MATa ura3-52 lys2-801 ade2-101 trp1Δ63 his3Δ200 leu2Δ1 [pRS415-PGAL1-3HA-cse4 P53V]</i>                              | This study |
| Y2264 | <i>MATa ura3-52 lys2-801 ade2-101 trp1Δ63 his3Δ200 leu2Δ1 [pRS415-PGAL1-3HA-cse4 P98V]</i>                              | This study |
| Y2265 | <i>MATa ura3-52 lys2-801 ade2-101 trp1Δ63 his3Δ200 leu2Δ1 [pRS415-PGAL1-3HA-cse4 P100V]</i>                             | This study |
| Y2266 | <i>MATa ura3-52 lys2-801 ade2-101 trp1Δ63 his3Δ200 leu2Δ1 [pRS415-PGAL1-3HA-cse4 P134V]</i>                             | This study |
| Y2267 | <i>MATa ura3-52 lys2-801 ade2-101 trp1Δ63 his3Δ200 leu2Δ1 [pRS415-PGAL1-3HA-cse4 P157V]</i>                             | This study |
| Y2280 | <i>MATα ura3-52 lys2-801 ade2-101 trp1Δ63 his3Δ200 leu2Δ1 PSH1-myc:TRP1</i>                                             | This study |
| Y2281 | <i>MATα ura3-52 lys2-801 ade2-101 trp1Δ63 his3Δ200 leu2Δ1 PSH1-myc:TRP1 fpr3Δ::kanMX6</i>                               | This study |
| Y2282 | <i>MATα ura3-52 lys2-801 ade2-101 trp1Δ63 his3Δ200 leu2Δ1 PSH1-myc:TRP1 fpr4Δ::kanMX6</i>                               | This study |
| Y2283 | <i>MATα ura3-52 lys2-801 ade2-101 trp1Δ63 his3Δ200 leu2Δ1 PSH1-myc:TRP1 fpr3Δ::kanMX6 fpr4Δ::kanMX6</i>                 | This study |
| Y2284 | <i>MATa ura3-52 lys2-801 ade2-101 trp1Δ63 his3Δ200 leu2Δ1 PSH1-myc:TRP1 cse4Δ::TRP1 [pRS415-CSE4]</i>                   | This study |
| Y2285 | <i>MATa ura3-52 lys2-801 ade2-101 trp1Δ63 his3Δ200 leu2Δ1 PSH1-myc:TRP1 cse4Δ::TRP1 [pRS415-cse4 P134V]</i>             | This study |
| Y2342 | <i>MATα ura3-52 lys2-801 ade2-101 trp1Δ63 his3Δ200 leu2Δ1 CSE4-myc:His3MX6</i>                                          | This study |
| Y2344 | <i>MATα ura3-52 lys2-801 ade2-101 trp1Δ63 his3Δ200 leu2Δ1 CSE4-myc:His3MX6 fpr3Δ::kanMX6</i>                            | This study |
| Y2345 | <i>MATα ura3-52 lys2-801 ade2-101 trp1Δ63 his3Δ200 leu2Δ1 CSE4-myc:His3MX6 fpr4Δ::kanMX6</i>                            | This study |

Y2346

*MAT $\alpha$*  *ura3-52 lys2-801 ade2-101 trp1 $\Delta$ 63 his3 $\Delta$ 200 leu2 $\Delta$ 1*  
*CSE4-myc:His3MX6 fpr3 $\Delta$ ::kanMX6 fpr4 $\Delta$ ::kanMX6*

---

This study
