# Supplementary material
Source: PubMed Central journal article supplement (PMC3982699)
Supplement: 911b597c375dc6d6311e1971b0edef49_genetics.114.161224-5.pdf [file 911b597c375dc6d6311e1971b0edef49_genetics.114.161224-5.pdf]

**Table S2 Plasmids used in this study**

| Plasmid | Relevant characteristics            | Reference  |
|---------|-------------------------------------|------------|
| B2883   | pRS415- <i>PGAL1-3HA-CSE4</i>       | This study |
| B2884   | pRS416- <i>FPR3</i>                 | This study |
| B2885   | pRS416- <i>fpr3 W363L</i>           | This study |
| B2886   | pRS416- <i>fpr3 F402Y</i>           | This study |
| B2887   | pRS415- <i>CSE4</i>                 | This study |
| B2891   | pRS415- <i>cse4 P134V</i>           | This study |
| B2893   | pRS415- <i>PGAL1-3HA-cse4 P53V</i>  | This study |
| B2894   | pRS415- <i>PGAL1-3HA-cse4 P98V</i>  | This study |
| B2895   | pRS415- <i>PGAL1-3HA-cse4 P100V</i> | This study |
| B2896   | pRS415- <i>PGAL1-3HA-cse4 P134V</i> | This study |
| B2897   | pRS415- <i>PGAL1-3HA-cse4 P157V</i> | This study |
