# Supplementary material
Source: PubMed Central journal article supplement (PMC3982699)
Supplement: b8107e2ade8ad9e306304e0ab828ef35_genetics.114.161224-4.pdf [file b8107e2ade8ad9e306304e0ab828ef35_genetics.114.161224-4.pdf]

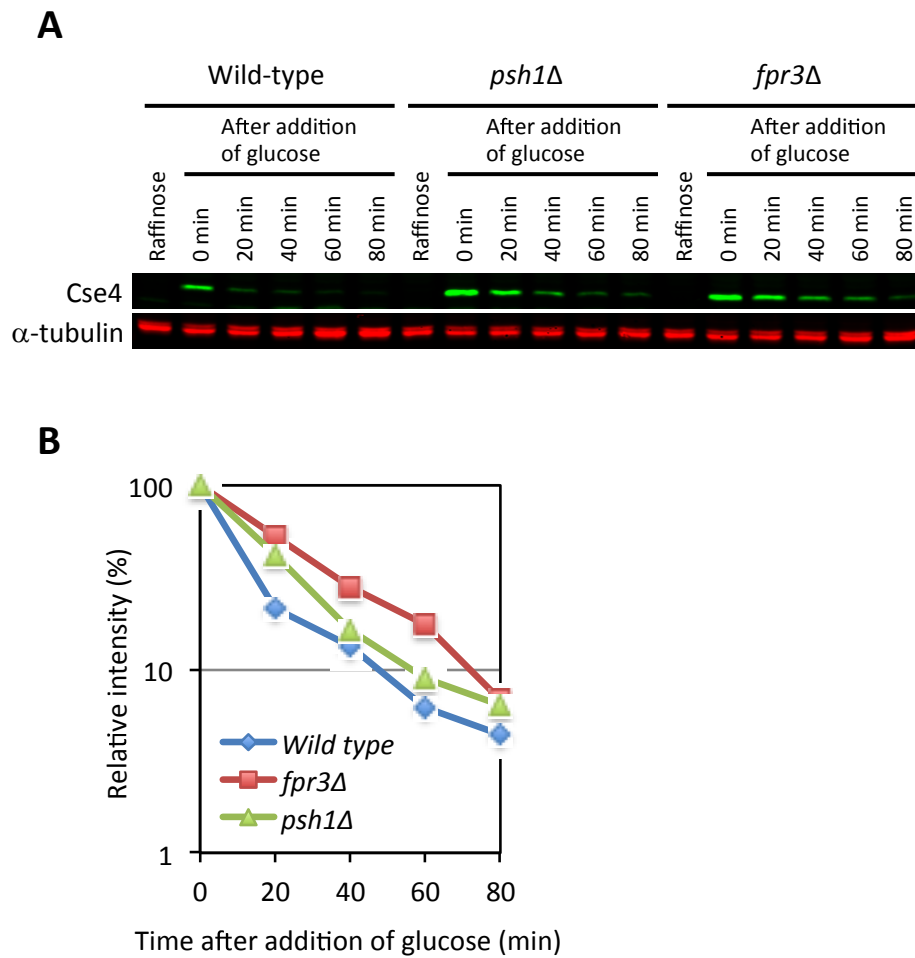

**Figure S2** The stabilization level of Cse4 in *fpr3Δ* cells is higher than that in *psh1Δ* cells. The protein stability assay was performed as described in Figure 2. Isogenic yeast strains were wild-type (Y2255), *fpr3Δ* (Y2256), and *psh1Δ* (Y2258).
