# Supplementary material
Source: PubMed Central journal article supplement (PMC3982699)
Supplement: dff80d85eb6e1156e1c1954a5db4b40c_genetics.114.161224-2.pdf [file dff80d85eb6e1156e1c1954a5db4b40c_genetics.114.161224-2.pdf]

## File S1

### Supplemental methods

#### Yeast strains and plasmids

Supplemental Table S1 and S2 present the genotype of yeast strains and plasmids used for this study, respectively.

#### Protein stability assay

Cells were grown in a 2% raffinose synthetic complete medium overnight. Cells were then diluted to an optical density at 600 nm of 0.3 and grown for an additional 3 h at 25°C. A sample was removed as a negative control before the addition of galactose (Raffinose). Galactose was added to the media to a final concentration of 2% to induce expression of Cse4 from the *GAL1* promoter for 2 h at 25°C. Glucose was then added to a final concentration of 5% to stop gene expression, and samples were taken at the indicated time points.

#### Antibodies

Anti-Cse4 antibody was generated as previously described (OHKUNI *et al.* 2008). Anti-Cdc28 was a gift from Dr. Deshaies's laboratory. Anti-myc (Roche, Indianapolis, IN), anti-HA (Roche, Indianapolis, IN), and anti-tubulin (Serotech, Oxford, UK) antibodies were purchased.

#### Western blotting and quantitation

Western blotting and quantitation were performed as described previously (ESCAMILLA-POWERS and SEARS 2007). In brief, protein from equal cell numbers were separated by SDS-PAGE gel and transferred to Immobilon-FL membrane (Millipore, Billerica, MA). Membrane was blocked with Odyssey Blocking buffer (LI-COR Biosciences, Lincoln, NE) after shaking the membrane in PBS for several minutes. Primary and secondary antibodies were diluted in Odyssey Blocking buffer with 0.1% Tween 20. Anti-Cse4 was used at a dilution of 1:1000, and anti-tubulin and anti-Cdc28 were used at 1:5000. Secondary antibodies were used at a dilution of 1:15000. Blots were scanned with a LI-COR Odyssey CLx Imager (Lincoln, NE). Protein levels at each time point were quantitated using Image Studio software version 2.0.
