# Supplementary material
Source: PubMed Central journal article supplement (PMC3982699)
Supplement: ec07d03e27e1298026bd39bac4abb6b2_genetics.114.161224-1.pdf [file ec07d03e27e1298026bd39bac4abb6b2_genetics.114.161224-1.pdf]

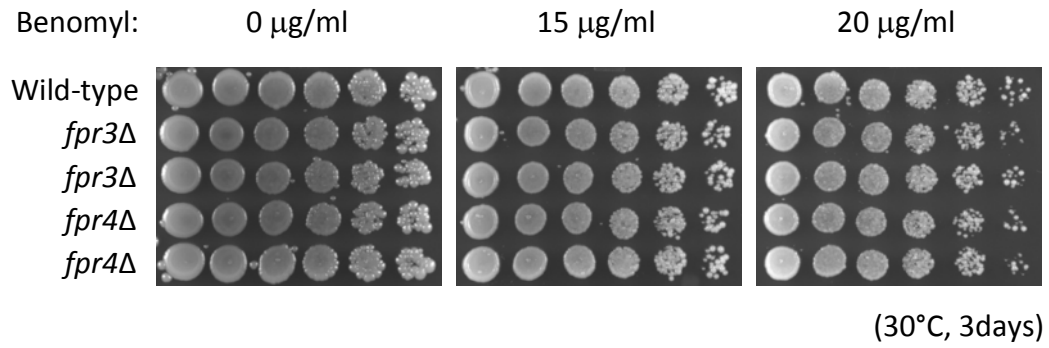

**Figure S1** *fpr3* $\Delta$  or *fpr4* $\Delta$  cells don't show any benomyl sensitivity. Yeast cells were spotted in 5-fold dilutions from  $5 \times 10^4$  cells per spot on YPD plates containing benomyl. The plates were incubated at 30°C for 3 days and photographed. Isogenic yeast strains were wild-type (YPH499), *fpr3* $\Delta$  (Y2243 and Y2244), and *fpr4* $\Delta$  (Y2245 and Y2246).

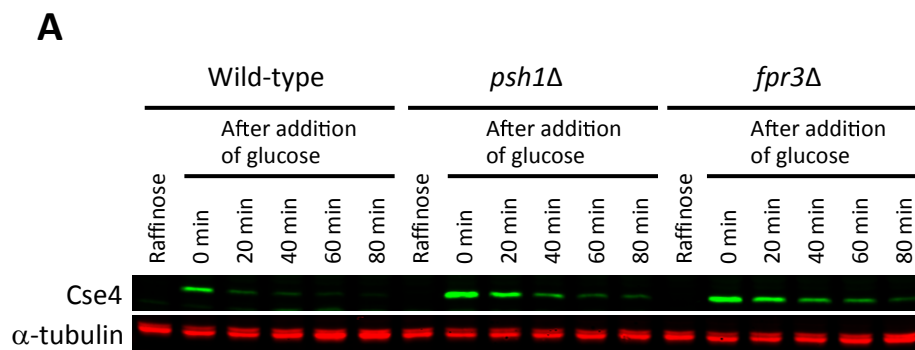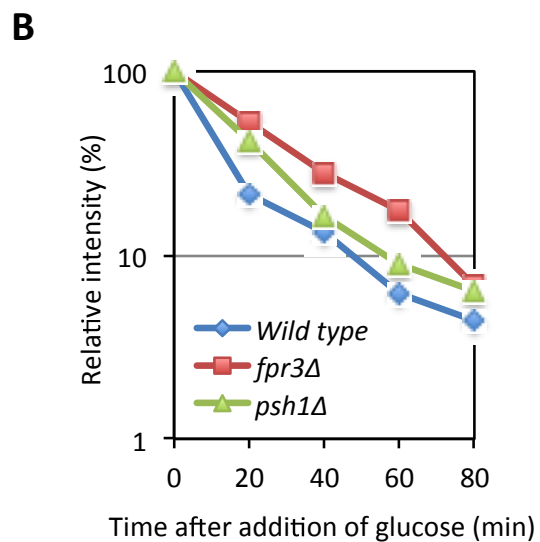

**Figure S2** The stabilization level of Cse4 in *fpr3Δ* cells is higher than that in *psh1Δ* cells. The protein stability assay was performed as described in Figure 2. Isogenic yeast strains were wild-type (Y2255), *fpr3Δ* (Y2256), and *psh1Δ* (Y2258).

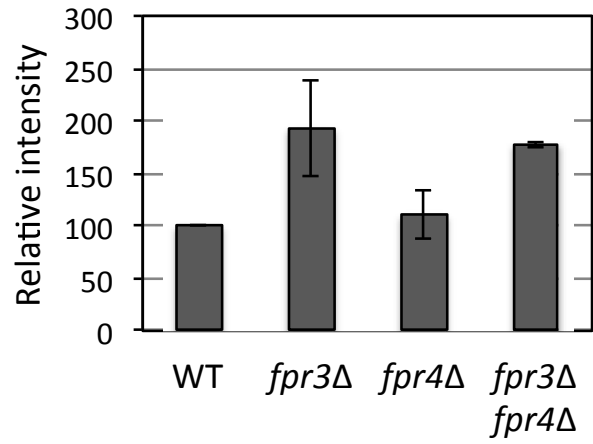

**Figure S3** Enhanced *CEN* DNA interaction with Cse4 in *fpr3*Δ mutant. The indicated strains, Cse4-myc (Y2342), Cse4-myc *fpr3*Δ (Y2344), Cse4-myc *fpr4*Δ (Y2345), and Cse4-myc *fpr3*Δ *fpr4*Δ (Y2346), were grown to log phase, lysed, and anti-myc chromatin immunoprecipitation assay was performed as previously described (Ohkuni *et al.* 2008). We used ImageJ to quantify the signals.

## File S1

### Supplemental methods

#### Yeast strains and plasmids

Supplemental Table S1 and S2 present the genotype of yeast strains and plasmids used for this study, respectively.

#### Protein stability assay

Cells were grown in a 2% raffinose synthetic complete medium overnight. Cells were then diluted to an optical density at 600 nm of 0.3 and grown for an additional 3 h at 25°C. A sample was removed as a negative control before the addition of galactose (Raffinose). Galactose was added to the media to a final concentration of 2% to induce expression of Cse4 from the *GAL1* promoter for 2 h at 25°C. Glucose was then added to a final concentration of 5% to stop gene expression, and samples were taken at the indicated time points.

#### Antibodies

Anti-Cse4 antibody was generated as previously described (OHKUNI *et al.* 2008). Anti-Cdc28 was a gift from Dr. Deshaies's laboratory. Anti-myc (Roche, Indianapolis, IN), anti-HA (Roche, Indianapolis, IN), and anti-tubulin (Serotech, Oxford, UK) antibodies were purchased.

#### Western blotting and quantitation

Western blotting and quantitation were performed as described previously (ESCAMILLA-POWERS and SEARS 2007). In brief, protein from equal cell numbers were separated by SDS-PAGE gel and transferred to Immobilon-FL membrane (Millipore, Billerica, MA). Membrane was blocked with Odyssey Blocking buffer (LI-COR Biosciences, Lincoln, NE) after shaking the membrane in PBS for several minutes. Primary and secondary antibodies were diluted in Odyssey Blocking buffer with 0.1% Tween 20. Anti-Cse4 was used at a dilution of 1:1000, and anti-tubulin and anti-Cdc28 were used at 1:5000. Secondary antibodies were used at a dilution of 1:15000. Blots were scanned with a LI-COR Odyssey CLx Imager (Lincoln, NE). Protein levels at each time point were quantitated using Image Studio software version 2.0.

**Table S1 S. cerevisiae strains used in this study**

| Strains | Genotype                                                                                                      | Reference                  |
|---------|---------------------------------------------------------------------------------------------------------------|----------------------------|
| YPH499  | <i>MATa ura3-52 lys2-801 ade2-101 trp1Δ63 his3Δ200 leu2Δ1</i>                                                 | (SIKORSKI and HIETER 1989) |
| YPH500  | <i>MATα ura3-52 lys2-801 ade2-101 trp1Δ63 his3Δ200 leu2Δ1</i>                                                 | (SIKORSKI and HIETER 1989) |
| Y2243   | <i>MATa ura3-52 lys2-801 ade2-101 trp1Δ63 his3Δ200 leu2Δ1 fpr3Δ::kanMX6</i>                                   | This study                 |
| Y2244   | <i>MATa ura3-52 lys2-801 ade2-101 trp1Δ63 his3Δ200 leu2Δ1 fpr3Δ::kanMX6</i>                                   | This study                 |
| Y2245   | <i>MATa ura3-52 lys2-801 ade2-101 trp1Δ63 his3Δ200 leu2Δ1 fpr4Δ::kanMX6</i>                                   | This study                 |
| Y2246   | <i>MATa ura3-52 lys2-801 ade2-101 trp1Δ63 his3Δ200 leu2Δ1 fpr4Δ::kanMX6</i>                                   | This study                 |
| Y2247   | <i>MATa ura3-52 lys2-801 ade2-101 trp1Δ63 his3Δ200 leu2Δ1 fpr3Δ::kanMX6 fpr4Δ::kanMX6</i>                     | This study                 |
| Y2248   | <i>MATα ura3-52 lys2-801 ade2-101 trp1Δ63 his3Δ200 leu2Δ1 fpr3Δ::kanMX6 fpr4Δ::kanMX6</i>                     | This study                 |
| Y14     | <i>MATa ura3-52 lys2-801 ade2-101 trp1Δ63 his3Δ200 leu2Δ1 CFIII (CEN3.L.YPH983) TRP1 SUP11</i>                | P. Hieter                  |
| Y2249   | <i>MATa ura3-52 lys2-801 ade2-101 trp1Δ63 his3Δ200 leu2Δ1 CFIII (CEN3.L.YPH983) TRP1 SUP11 fpr3Δ::His3MX6</i> | This study                 |
| Y2250   | <i>MATa ura3-52 lys2-801 ade2-101 trp1Δ63 his3Δ200 leu2Δ1 CFIII (CEN3.L.YPH983) TRP1 SUP11 fpr3Δ::His3MX6</i> | This study                 |
| Y2251   | <i>MATa ura3-52 lys2-801 ade2-101 trp1Δ63 his3Δ200 leu2Δ1 CFIII (CEN3.L.YPH983) TRP1 SUP11 fpr3Δ::His3MX6</i> | This study                 |
| Y2252   | <i>MATa ura3-52 lys2-801 ade2-101 trp1Δ63 his3Δ200 leu2Δ1 CFIII (CEN3.L.YPH983) TRP1 SUP11 fpr4Δ::His3MX6</i> | This study                 |
| Y2253   | <i>MATa ura3-52 lys2-801 ade2-101 trp1Δ63 his3Δ200 leu2Δ1 CFIII (CEN3.L.YPH983) TRP1 SUP11 fpr4Δ::kanMX6</i>  | This study                 |
| Y2254   | <i>MATa ura3-52 lys2-801 ade2-101 trp1Δ63 his3Δ200 leu2Δ1 CFIII (CEN3.L.YPH983) TRP1 SUP11 fpr4Δ::kanMX6</i>  | This study                 |
| Y2255   | <i>MATa ura3-52 lys2-801 ade2-101 trp1Δ63 his3Δ200 leu2Δ1 [pRS415-PGAL1-3HA-CSE4]</i>                         | This study                 |
| Y2256   | <i>MATa ura3-52 lys2-801 ade2-101 trp1Δ63 his3Δ200 leu2Δ1 fpr3Δ::kanMX6 [pRS415-PGAL1-3HA-CSE4]</i>           | This study                 |
| Y2257   | <i>MATa ura3-52 lys2-801 ade2-101 trp1Δ63 his3Δ200 leu2Δ1 fpr4Δ::kanMX6 [pRS415-PGAL1-3HA-CSE4]</i>           | This study                 |
| Y2258   | <i>MATa ura3-52 lys2-801 ade2-101 trp1Δ63 his3Δ200 leu2Δ1 psh1Δ::kanMX6 [pRS415-PGAL1-3HA-CSE4]</i>           | This study                 |

|       |                                                                                                                         |            |
|-------|-------------------------------------------------------------------------------------------------------------------------|------------|
| Y2340 | <i>MATa ura3-52 lys2-801 ade2-101 trp1Δ63 his3Δ200 leu2Δ1 fpr3Δ::kanMX6 psh1Δ::kanMX6 [pRS415-PGAL1-3HA-CSE4]</i>       | This study |
| Y2259 | <i>MATa ura3-52 lys2-801 ade2-101 trp1Δ63 his3Δ200 leu2Δ1 fpr3Δ::kanMX6 [pRS415-PGAL1-3HA-CSE4] [pRS416-FPR3]</i>       | This study |
| Y2260 | <i>MATa ura3-52 lys2-801 ade2-101 trp1Δ63 his3Δ200 leu2Δ1 fpr3Δ::kanMX6 [pRS415-PGAL1-3HA-CSE4] [pRS416]</i>            | This study |
| Y2261 | <i>MATa ura3-52 lys2-801 ade2-101 trp1Δ63 his3Δ200 leu2Δ1 fpr3Δ::kanMX6 [pRS415-PGAL1-3HA-CSE4] [pRS416-fpr3 W363L]</i> | This study |
| Y2262 | <i>MATa ura3-52 lys2-801 ade2-101 trp1Δ63 his3Δ200 leu2Δ1 fpr3Δ::kanMX6 [pRS415-PGAL1-3HA-CSE4] [pRS416-fpr3 F402Y]</i> | This study |
| Y2263 | <i>MATa ura3-52 lys2-801 ade2-101 trp1Δ63 his3Δ200 leu2Δ1 [pRS415-PGAL1-3HA-cse4 P53V]</i>                              | This study |
| Y2264 | <i>MATa ura3-52 lys2-801 ade2-101 trp1Δ63 his3Δ200 leu2Δ1 [pRS415-PGAL1-3HA-cse4 P98V]</i>                              | This study |
| Y2265 | <i>MATa ura3-52 lys2-801 ade2-101 trp1Δ63 his3Δ200 leu2Δ1 [pRS415-PGAL1-3HA-cse4 P100V]</i>                             | This study |
| Y2266 | <i>MATa ura3-52 lys2-801 ade2-101 trp1Δ63 his3Δ200 leu2Δ1 [pRS415-PGAL1-3HA-cse4 P134V]</i>                             | This study |
| Y2267 | <i>MATa ura3-52 lys2-801 ade2-101 trp1Δ63 his3Δ200 leu2Δ1 [pRS415-PGAL1-3HA-cse4 P157V]</i>                             | This study |
| Y2280 | <i>MATα ura3-52 lys2-801 ade2-101 trp1Δ63 his3Δ200 leu2Δ1 PSH1-myc:TRP1</i>                                             | This study |
| Y2281 | <i>MATα ura3-52 lys2-801 ade2-101 trp1Δ63 his3Δ200 leu2Δ1 PSH1-myc:TRP1 fpr3Δ::kanMX6</i>                               | This study |
| Y2282 | <i>MATα ura3-52 lys2-801 ade2-101 trp1Δ63 his3Δ200 leu2Δ1 PSH1-myc:TRP1 fpr4Δ::kanMX6</i>                               | This study |
| Y2283 | <i>MATα ura3-52 lys2-801 ade2-101 trp1Δ63 his3Δ200 leu2Δ1 PSH1-myc:TRP1 fpr3Δ::kanMX6 fpr4Δ::kanMX6</i>                 | This study |
| Y2284 | <i>MATa ura3-52 lys2-801 ade2-101 trp1Δ63 his3Δ200 leu2Δ1 PSH1-myc:TRP1 cse4Δ::TRP1 [pRS415-CSE4]</i>                   | This study |
| Y2285 | <i>MATa ura3-52 lys2-801 ade2-101 trp1Δ63 his3Δ200 leu2Δ1 PSH1-myc:TRP1 cse4Δ::TRP1 [pRS415-cse4 P134V]</i>             | This study |
| Y2342 | <i>MATα ura3-52 lys2-801 ade2-101 trp1Δ63 his3Δ200 leu2Δ1 CSE4-myc:His3MX6</i>                                          | This study |
| Y2344 | <i>MATα ura3-52 lys2-801 ade2-101 trp1Δ63 his3Δ200 leu2Δ1 CSE4-myc:His3MX6 fpr3Δ::kanMX6</i>                            | This study |
| Y2345 | <i>MATα ura3-52 lys2-801 ade2-101 trp1Δ63 his3Δ200 leu2Δ1 CSE4-myc:His3MX6 fpr4Δ::kanMX6</i>                            | This study |

Y2346

*MAT $\alpha$*  *ura3-52 lys2-801 ade2-101 trp1 $\Delta$ 63 his3 $\Delta$ 200 leu2 $\Delta$ 1*  
*CSE4-myc:His3MX6 fpr3 $\Delta$ ::kanMX6 fpr4 $\Delta$ ::kanMX6*

---

This study

**Table S2 Plasmids used in this study**

| Plasmid | Relevant characteristics            | Reference  |
|---------|-------------------------------------|------------|
| B2883   | pRS415- <i>PGAL1-3HA-CSE4</i>       | This study |
| B2884   | pRS416- <i>FPR3</i>                 | This study |
| B2885   | pRS416- <i>fpr3 W363L</i>           | This study |
| B2886   | pRS416- <i>fpr3 F402Y</i>           | This study |
| B2887   | pRS415- <i>CSE4</i>                 | This study |
| B2891   | pRS415- <i>cse4 P134V</i>           | This study |
| B2893   | pRS415- <i>PGAL1-3HA-cse4 P53V</i>  | This study |
| B2894   | pRS415- <i>PGAL1-3HA-cse4 P98V</i>  | This study |
| B2895   | pRS415- <i>PGAL1-3HA-cse4 P100V</i> | This study |
| B2896   | pRS415- <i>PGAL1-3HA-cse4 P134V</i> | This study |
| B2897   | pRS415- <i>PGAL1-3HA-cse4 P157V</i> | This study |



### Literature Cited

ESCAMILLA-POWERS, J. R., and R. C. SEARS, 2007 A conserved pathway that controls c-Myc protein stability through opposing phosphorylation events occurs in yeast. *J Biol Chem* **282**: 5432-5442.

OHKUNI, K., R. ABDULLE, A. H. TONG, C. BOONE and K. KITAGAWA, 2008 Ybp2 associates with the central kinetochore of *Saccharomyces cerevisiae* and mediates proper mitotic progression. *PLoS One* **3**: e1617.

SIKORSKI, R. S., and P. HIETER, 1989 A system of shuttle vectors and yeast host strains designed for efficient manipulation of DNA in *Saccharomyces cerevisiae*. *Genetics* **122**: 19-27.
